# Supplementary material for: Mendel,MD: A user-friendly open-source web tool for analyzing WES and WGS in the diagnosis of patients with Mendelian disorders
Source: PLoS Comput Biol. 2017 Jun 8;13(6):e1005520. doi: 10.1371/journal.pcbi.1005520 (PMC5464533; doi:10.1371/journal.pcbi.1005520)
Supplement: S2 Table — Number of variants and the mean of coverage for each sample received. (XLSX) [file pcbi.1005520.s003.xlsx]

## Sheet: Sheet1
Individual Number	Clinical Case Number	Individual ID	Number of Variants	Mean of Coverage
1	1	DG00658	86445	63.25
2	2	P6NV	64861	31.02
3	3	P2	62475	43.5
4	4	NI1000380	22793	64.5
5	4	NI1001037	22014	55.75
6	5	924	55983	181.2
7	5	3037	56010	180.38
8	5	3121	55481	180.97
9	6	NI40816	22462	42.3
10	6	NI54126	22052	46.57
11	6	NI48062	24632	47.89
12	6	NI43664	22151	38.59
13	7	DG1365	70809	28.68
14	8	P5	61981	28.66
15	9	P3	95610	47.02
16	10	S0001	18732	73.66
17	11	child	49528	17.13
18	11	father	41357	38.48
19	11	mother	46993	23.52
